# Supplementary figures and images for: MALDI mass spectrometry for probing the anti- staphylococcal capability of TiO2nanoparticles via near-UV and laser irradiation
Source: Royal Society of Chemistry journal article supplement (doi:10.1039/c4nj01798f), 2015-01-01

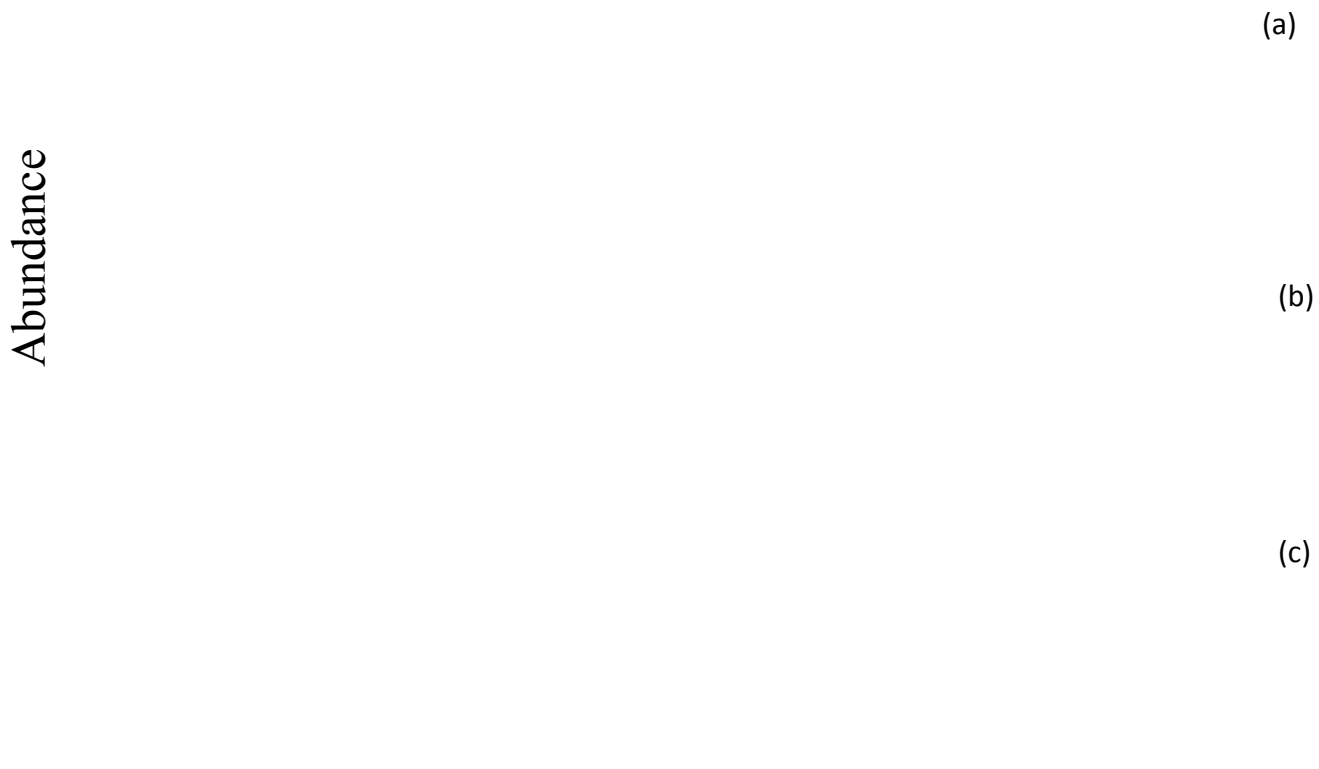

Fig S1 B

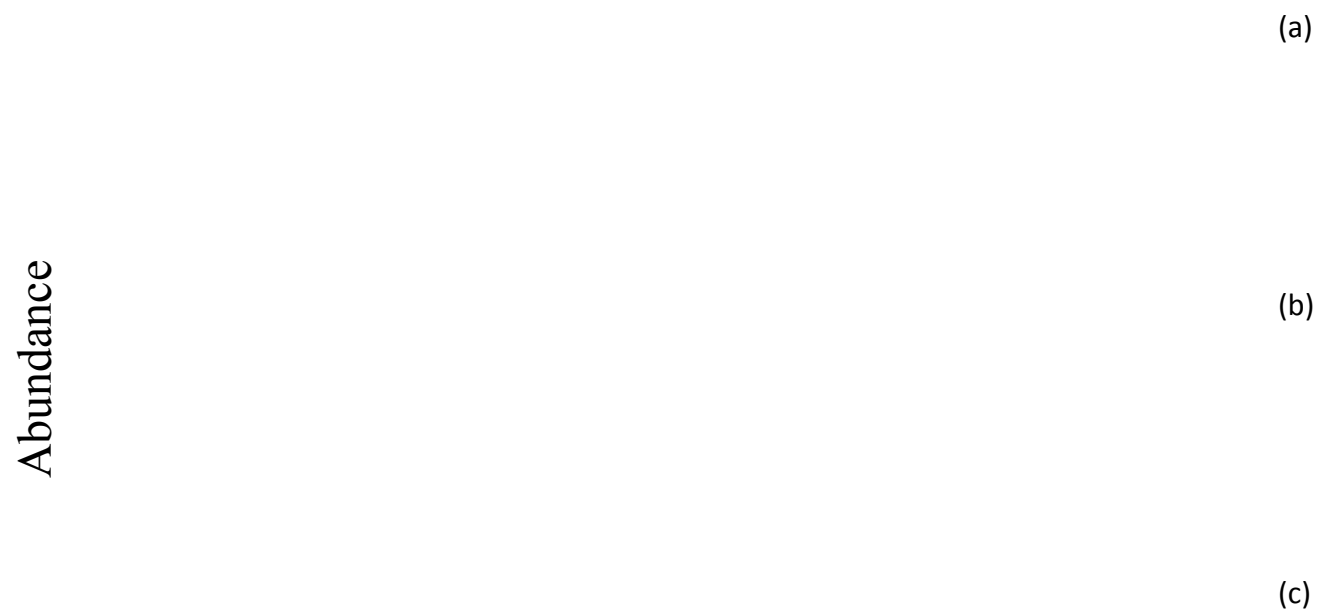

Fig S2A

Abundance

(a)

(b)

(c)

Fig S2B

Abundance

(a)

(b)

(c)

Supplement: c4nj01798f1.pdf [file c4nj01798f1.pdf]
